# Supplementary material for: A Landscape Study on COVID-19 Immunity at the Single-Cell Level
Source: Front Immunol. 2022 Jul 15;13:918383. doi: 10.3389/fimmu.2022.918383 (PMC9334848; doi:10.3389/fimmu.2022.918383)
Supplement: Supplementary Table 1 — Clinical data of the enrolled COVID-19 patients examined by scRNA-seq. [file Table_1.xlsx]

## Sheet: Sheet1
DataID	characteristics: geo accession	Patient ID	Hospital day	Sampling day (Days after symptom onset)	characteristics: CoVID-19 severity	characteristics: Sample type	characteristics: Sex	characteristics: Age
GSE158055	GSM4787512	S-S070-1	unknown	7	severe/critical	frozen PBMC	F	32
GSE158055	GSM4787513	S-S070-2	unknown	7	severe/critical	frozen PBMC	F	32
GSE158055	GSM4787514	S-S070-3	unknown	14	severe/critical	frozen PBMC	F	32
GSE158055	GSM4787507	S-S069-1	unknown	3	severe/critical	frozen PBMC	F	63
GSE158055	GSM4787508	S-S069-2	unknown	9	severe/critical	frozen PBMC	F	63
GSE158055	GSM4787509	S-S069-3	unknown	15	severe/critical	frozen PBMC	F	63
GSE158055	GSM4787515	S-S071-1	unknown	3	severe/critical	frozen PBMC	M	67
GSE158055	GSM4787516	S-S071-2	unknown	9	severe/critical	frozen PBMC	M	67
GSE158055	GSM4787517	S-S072-1	unknown	4	severe/critical	frozen PBMC	M	38
GSE158055	GSM4787518	S-S072-2	unknown	9	severe/critical	frozen PBMC	M	38
GSE158055	GSM4787519	S-S072-3	unknown	12	severe/critical	frozen PBMC	M	38
GSE158055	GSM4787383	S-M056	unknown	16	mild/moderate	frozen PBMC	M	16
GSE158055	GSM4787384	S-M057	unknown	2	mild/moderate	frozen PBMC	M	6
GSE158055	GSM4787370	S-M044-1	unknown	6	mild/moderate	fresh PBMC	F	55
GSE158055	GSM4787368	S-M043-1	unknown	9	mild/moderate	fresh PBMC	M	36
GSE158055	GSM4787375	S-M048	unknown	11	mild/moderate	fresh PBMC	M	43
GSE158055	GSM4787371	S-M044-2	unknown	19	mild/moderate	fresh PBMC	F	55
GSE158055	GSM4787369	S-M043-2	unknown	5	mild/moderate	fresh PBMC	M	36
GSE158055	GSM4787492	S-S054	unknown	4	severe/critical	fresh PBMC	M	40
GSE158055	GSM4787494	S-S056	unknown	5	severe/critical	fresh PBMC	F	79
GSE158055	GSM4787366	S-M042-1	unknown	10	mild/moderate	fresh PBMC	F	41
GSE158055	GSM4787364	S-M041-1	unknown	4	mild/moderate	fresh PBMC	M	15
GSE158055	GSM4787376	S-M049	unknown	8	mild/moderate	fresh PBMC	M	35
GSE158055	GSM4787373	S-M046	unknown	7	mild/moderate	fresh PBMC	F	60
GSE158055	GSM4787374	S-M047	unknown	7	mild/moderate	fresh PBMC	M	37
GSE158055	GSM4787493	S-S055	unknown	15	severe/critical	fresh PBMC	F	50
GSE158055	GSM4787495	S-S057	unknown	10	severe/critical	fresh PBMC	M	78
GSE158055	GSM4787372	S-M045	unknown	26	mild/moderate	fresh PBMC	M	48
GSE158055	GSM4787365	S-M041-2	unknown	21	mild/moderate	fresh PBMC	M	15
GSE158055	GSM4787367	S-M042-2	unknown	27	mild/moderate	fresh PBMC	F	41
GSE158055	GSM4787555	S-HC008	unknown	control	control	fresh PBMC	M	44
GSE158055	GSM4787556	S-HC009	unknown	control	control	fresh PBMC	M	29
GSE158055	GSM4787557	S-HC010	unknown	control	control	fresh PBMC	M	58
GSE158055	GSM4787558	S-HC011	unknown	control	control	fresh PBMC	M	35
GSE158055	GSM4787559	S-HC012	unknown	control	control	fresh PBMC	M	33
GSE158055	GSM4787382	S-M055	unknown	64	mild/moderate	frozen PBMC	M	58
GSE158055	GSM4787380	S-M053	unknown	66	mild/moderate	frozen PBMC	M	43
GSE158055	GSM4787505	S-S067	unknown	62	severe/critical	frozen PBMC	F	69
GSE158055	GSM4787503	S-S065	unknown	65	severe/critical	frozen PBMC	F	50
GSE158055	GSM4787378	S-M051	unknown	66	mild/moderate	frozen PBMC	F	70
GSE158055	GSM4787560	S-HC013	unknown	control	control	frozen PBMC	M	45
GSE158055	GSM4787561	S-HC014	unknown	control	control	frozen PBMC	M	37
GSE158055	GSM4787562	S-HC015	unknown	control	control	frozen PBMC	F	69
GSE158055	GSM4787563	S-HC016	unknown	control	control	frozen PBMC	F	55
GSE158055	GSM4787564	S-HC017	unknown	control	control	frozen PBMC	F	71
GSE158055	GSM4787502	S-S064	unknown	77	severe/critical	frozen PBMC	M	74
GSE158055	GSM4787381	S-M054	unknown	75	mild/moderate	frozen PBMC	M	48
GSE158055	GSM4787379	S-M052	unknown	74	mild/moderate	frozen PBMC	M	49
GSE158055	GSM4787506	S-S068	unknown	71	severe/critical	frozen PBMC	F	72
GSE158055	GSM4787504	S-S066	unknown	80	severe/critical	frozen PBMC	F	33
GSE158055	GSM4787496	S-S058	unknown	64	severe/critical	frozen PBMC	M	77
GSE158055	GSM4787497	S-S059	unknown	24	severe/critical	frozen PBMC	F	70
GSE158055	GSM4787498	S-S060	unknown	75	severe/critical	frozen PBMC	M	81
GSE158055	GSM4787377	S-M050	unknown	74	mild/moderate	frozen PBMC	M	50
GSE158055	GSM4787499	S-S061	unknown	68	severe/critical	frozen PBMC	F	54
GSE158055	GSM4787500	S-S062	unknown	57	severe/critical	frozen PBMC	M	50
GSE158055	GSM4787501	S-S063	unknown	45	severe/critical	frozen PBMC	F	82
GSE158055	GSM4787408	S-M061-1	unknown	18	mild/moderate	CD19+ B cell sorted from fresh PBMC (FACS)	F	26
GSE158055	GSM4787409	S-M061-2	unknown	18	mild/moderate	CD3+ T cell sorted from fresh PBMC (FACS)	F	26
GSE158055	GSM4787565	S-HC018-1	unknown	control	control	CD19+ B cell sorted from fresh PBMC (FACS)	M	55
GSE158055	GSM4787566	S-HC018-2	unknown	control	control	CD3+ T cell sorted from fresh PBMC (FACS)	M	55
GSE158055	GSM4787520	S-S073-1	unknown	60	severe/critical	CD19+ B cell sorted from fresh PBMC (FACS)	M	67
GSE158055	GSM4787521	S-S073-2	unknown	60	severe/critical	CD3+ T cell sorted from fresh PBMC (FACS)	M	67
GSE158055	GSM4787522	S-S074-1	unknown	34	severe/critical	CD19+ B cell sorted from fresh PBMC (FACS)	M	57
GSE158055	GSM4787523	S-S074-2	unknown	34	severe/critical	CD3+ T cell sorted from fresh PBMC (FACS)	M	57
GSE158055	GSM4787410	S-M062-1	unknown	25	mild/moderate	CD19+ B cell sorted from fresh PBMC (FACS)	F	35
GSE158055	GSM4787411	S-M062-2	unknown	25	mild/moderate	CD3+ T cell sorted from fresh PBMC (FACS)	F	35
GSE158055	GSM4787385	S-M058-1	unknown	21	mild/moderate	CD19+ B cell sorted from fresh PBMC (FACS)	F	46
GSE158055	GSM4787386	S-M058-2	unknown	21	mild/moderate	CD3+ T cell sorted from fresh PBMC (FACS)	F	46
GSE158055	GSM4787412	S-M063-1	unknown	30	mild/moderate	CD19+ B cell sorted from fresh PBMC (FACS)	M	35
GSE158055	GSM4787413	S-M063-2	unknown	30	mild/moderate	CD3+ T cell sorted from fresh PBMC (FACS)	M	35
GSE158055	GSM4787567	S-HC019-1	unknown	control	control	CD19+ B cell sorted from fresh PBMC (FACS)	M	26
GSE158055	GSM4787568	S-HC019-2	unknown	control	control	CD3+ T cell sorted from fresh PBMC (FACS)	M	26
GSE158055	GSM4787387	S-M059-1	unknown	23	mild/moderate	CD19+ B cell sorted from fresh PBMC (FACS)	F	62
GSE158055	GSM4787388	S-M059-2	unknown	23	mild/moderate	CD3+ T cell sorted from fresh PBMC (FACS)	F	62
GSE158055	GSM4787389	S-M060-1	unknown	25	mild/moderate	CD19+ B cell sorted from fresh PBMC (FACS)	F	87
GSE158055	GSM4787390	S-M060-2	unknown	25	mild/moderate	CD3+ T cell sorted from fresh PBMC (FACS)	F	87
GSE158055	GSM4787524	S-S075-1	unknown	45	severe/critical	CD19+ B cell sorted from fresh PBMC (FACS)	F	58
GSE158055	GSM4787525	S-S075-2	unknown	45	severe/critical	CD3+ T cell sorted from fresh PBMC (FACS)	F	58
GSE158055	GSM4787526	S-S076-1	unknown	15	severe/critical	CD19+ B cell sorted from fresh PBMC (FACS)	M	78
GSE158055	GSM4787527	S-S076-2	unknown	15	severe/critical	CD3+ T cell sorted from fresh PBMC (FACS)	M	78
GSE158055	GSM4787569	S-HC020-1	unknown	control	control	CD19+ B cell sorted from fresh PBMC (FACS)	M	29
GSE158055	GSM4787570	S-HC020-2	unknown	control	control	CD3+ T cell sorted from fresh PBMC (FACS)	M	29
GSE158055	GSM4787468	S-S035-1	unknown	9	severe/critical	frozen PBMC	M	39
GSE158055	GSM4787469	S-S035-2	unknown	9	severe/critical	frozen PBMC	M	39
GSE158055	GSM4787470	S-S035-3	unknown	14	severe/critical	frozen PBMC	M	39
GSE158055	GSM4787471	S-S035-4	unknown	14	severe/critical	frozen PBMC	M	39
GSE158055	GSM4787472	S-S036-1	unknown	14	severe/critical	frozen PBMC	M	78
GSE158055	GSM4787473	S-S036-2	unknown	19	severe/critical	frozen PBMC	M	78
GSE158055	GSM4787474	S-S036-3	unknown	21	severe/critical	frozen PBMC	M	78
GSE158055	GSM4787391	S-M064	unknown	15	mild/moderate	fresh PBMC	F	19
GSE158055	GSM4787392	S-M065	unknown	15	mild/moderate	fresh PBMC	F	20
GSE158055	GSM4787393	S-M066	unknown	15	mild/moderate	fresh PBMC	M	15
GSE158055	GSM4787394	S-M067	unknown	15	mild/moderate	fresh PBMC	M	48
GSE158055	GSM4787395	S-M068	unknown	15	mild/moderate	fresh PBMC	M	19
GSE158055	GSM4787401	S-M074-1	unknown	11	mild/moderate	fresh BALF	M	36
GSE158055	GSM4787403	S-M075	unknown	9	mild/moderate	fresh BALF	F	37
GSE158055	GSM4787538	S-S086-1	unknown	18	severe/critical	fresh BALF	M	66
GSE158055	GSM4787404	S-M076-1	unknown	13	mild/moderate	fresh BALF	M	35
GSE158055	GSM4787536	S-S085-1	unknown	11	severe/critical	fresh BALF	M	62
GSE158055	GSM4787540	S-S087-1	unknown	14	severe/critical	fresh BALF	M	63
GSE158055	GSM4787542	S-S088-1	unknown	25	severe/critical	fresh BALF	F	65
GSE158055	GSM4787544	S-S089-1	unknown	8	severe/critical	fresh BALF	F	57
GSE158055	GSM4787546	S-S090-1	unknown	12	severe/critical	fresh BALF	M	46
GSE158055	GSM4787510	S-S091	unknown	13	severe/critical	fresh PBMC	M	73
GSE158055	GSM4787547	S-S090-2	unknown	12	severe/critical	fresh PBMC	M	46
GSE158055	GSM4787511	S-S092	unknown	11	severe/critical	fresh PBMC	M	67
GSE158055	GSM4787405	S-M076-2	unknown	20	mild/moderate	fresh PBMC	M	35
GSE158055	GSM4787402	S-M074-2	unknown	13	mild/moderate	fresh PBMC	M	36
GSE158055	GSM4787543	S-S088-2	unknown	24	severe/critical	fresh PBMC	F	65
GSE158055	GSM4787537	S-S085-2	unknown	19	severe/critical	fresh PBMC	M	62
GSE158055	GSM4787545	S-S089-2	unknown	8	severe/critical	fresh PBMC	F	57
GSE158055	GSM4787541	S-S087-2	unknown	21	severe/critical	fresh PBMC	M	63
GSE158055	GSM4787539	S-S086-2	unknown	28	severe/critical	fresh PBMC	M	66
GSE158055	GSM4787406	S-M077	unknown	5	mild/moderate	fresh PBMC	M	42
GSE158055	GSM4787407	S-M078	unknown	6	mild/moderate	fresh PBMC	F	49
GSE158055	GSM4787350	S-M079	unknown	7	mild/moderate	fresh PBMC	F	32
GSE158055	GSM4787548	S-HC001	unknown	control	control	CD3+ T cell and CD19+ B cell sorted from fresh PBMC (FACS)	F	53
GSE158055	GSM4787549	S-HC002	unknown	control	control	CD3+ T cell and CD19+ B cell sorted from fresh PBMC (FACS)	M	49
GSE158055	GSM4787455	S-S024	unknown	66	severe/critical	CD3+ T cell and CD19+ B cell sorted from fresh PBMC (FACS)	M	44
GSE158055	GSM4787457	S-S026	unknown	74	severe/critical	CD3+ T cell and CD19+ B cell sorted from fresh PBMC (FACS)	F	50
GSE158055	GSM4787328	S-M013	unknown	69	mild/moderate	CD3+ T cell and CD19+ B cell sorted from fresh PBMC (FACS)	F	45
GSE158055	GSM4787329	S-M014	unknown	57	mild/moderate	CD3+ T cell and CD19+ B cell sorted from fresh PBMC (FACS)	M	56
GSE158055	GSM4787330	S-M015	unknown	69	mild/moderate	CD3+ T cell and CD19+ B cell sorted from fresh PBMC (FACS)	F	50
GSE158055	GSM4787331	S-M016	unknown	83	mild/moderate	CD3+ T cell and CD19+ B cell sorted from fresh PBMC (FACS)	M	30
GSE158055	GSM4787454	S-S023	unknown	65	severe/critical	CD3+ T cell and CD19+ B cell sorted from fresh PBMC (FACS)	M	67
GSE158055	GSM4787456	S-S025	unknown	68	severe/critical	CD3+ T cell and CD19+ B cell sorted from fresh PBMC (FACS)	F	67
GSE158055	GSM4787458	S-S027	unknown	69	severe/critical	CD3+ T cell and CD19+ B cell sorted from fresh PBMC (FACS)	F	57
GSE158055	GSM4787467	S-S034	unknown	23	severe/critical	frozen PBMC	M	38
GSE158055	GSM4787340	S-M025	unknown	22	mild/moderate	frozen PBMC	M	73
GSE158055	GSM4787466	S-S033	unknown	34	severe/critical	frozen PBMC	M	52
GSE158055	GSM4787550	S-HC003	unknown	control	control	fresh PBMC	M	46
GSE158055	GSM4787551	S-HC004	unknown	control	control	fresh PBMC	M	34
GSE158055	GSM4787345	S-M028	unknown	17	mild/moderate	frozen PBMC	M	32
GSE158055	GSM4787346	S-M029	unknown	23	mild/moderate	frozen PBMC	M	47
GSE158055	GSM4787344	S-M027	unknown	16	mild/moderate	frozen PBMC	M	54
GSE158055	GSM4787341	S-M026-1	unknown	11	mild/moderate	frozen PBMC	F	32
GSE158055	GSM4787463	S-S032-1	unknown	22	severe/critical	frozen PBMC	M	70
GSE158055	GSM4787464	S-S032-2	unknown	49	severe/critical	frozen PBMC	M	70
GSE158055	GSM4787465	S-S032-3	unknown	16	severe/critical	frozen PBMC	M	70
GSE158055	GSM4787342	S-M026-2	unknown	7	mild/moderate	frozen PBMC	F	62
GSE158055	GSM4787343	S-M026-3	unknown	22	mild/moderate	frozen PBMC	F	62
GSE158055	GSM4787298	S-M004-1	unknown	10	mild/moderate	B cells sorted from frozen PBMC (MACS, STEMCELL 19054)	F	41
GSE158055	GSM4787299	S-M004-2	unknown	10	mild/moderate	B cells sorted from frozen PBMC (MACS, STEMCELL 19054)	F	41
GSE158055	GSM4787300	S-M004-3	unknown	10	mild/moderate	B cells sorted from frozen PBMC (MACS, STEMCELL 19054)	F	41
GSE158055	GSM4787449	S-S022-1	unknown	33	severe/critical	B cells sorted from frozen PBMC (MACS, STEMCELL 19054)	M	63
GSE158055	GSM4787450	S-S022-2	unknown	33	severe/critical	B cells sorted from frozen PBMC (MACS, STEMCELL 19054)	M	63
GSE158055	GSM4787451	S-S022-3	unknown	44	severe/critical	B cells sorted from frozen PBMC (MACS, STEMCELL 19054)	M	63
GSE158055	GSM4787452	S-S022-4	unknown	44	severe/critical	B cells sorted from frozen PBMC (MACS, STEMCELL 19054)	M	63
GSE158055	GSM4787453	S-S022-5	unknown	44	severe/critical	B cells sorted from frozen PBMC (MACS, STEMCELL 19054)	M	63
GSE158055	GSM4787320	S-M010-1	unknown	47	mild/moderate	B cells sorted from frozen PBMC (MACS, STEMCELL 19054)	F	31
GSE158055	GSM4787321	S-M010-2	unknown	47	mild/moderate	B cells sorted from frozen PBMC (MACS, STEMCELL 19054)	F	31
GSE158055	GSM4787322	S-M010-3	unknown	47	mild/moderate	B cells sorted from frozen PBMC (MACS, STEMCELL 19054)	F	31
GSE158055	GSM4787323	S-M010-4	unknown	53	mild/moderate	B cells sorted from frozen PBMC (MACS, STEMCELL 19054)	F	31
GSE158055	GSM4787324	S-M010-5	unknown	53	mild/moderate	B cells sorted from frozen PBMC (MACS, STEMCELL 19054)	F	31
GSE158055	GSM4787325	S-M010-6	unknown	53	mild/moderate	B cells sorted from frozen PBMC (MACS, STEMCELL 19054)	F	31
GSE158055	GSM4787314	S-M009-1	unknown	36	mild/moderate	frozen PBMC	F	58
GSE158055	GSM4787315	S-M009-2	unknown	36	mild/moderate	frozen PBMC	F	58
GSE158055	GSM4787326	S-M011	unknown	44	mild/moderate	frozen PBMC	F	43
GSE158055	GSM4787327	S-M012	unknown	51	mild/moderate	frozen PBMC	F	48
GSE158055	GSM4787304	S-M005	unknown	44	mild/moderate	frozen PBMC	M	36
GSE158055	GSM4787305	S-M006	unknown	51	mild/moderate	frozen PBMC	M	51
GSE158055	GSM4787301	S-M004-4	unknown	28	mild/moderate	B cells sorted from frozen PBMC (MACS, STEMCELL 19054)	F	41
GSE158055	GSM4787302	S-M004-5	unknown	28	mild/moderate	B cells sorted from frozen PBMC (MACS, STEMCELL 19054)	F	41
GSE158055	GSM4787303	S-M004-6	unknown	28	mild/moderate	B cells sorted from frozen PBMC (MACS, STEMCELL 19054)	F	41
GSE158055	GSM4787436	S-S013	unknown	42	severe/critical	frozen PBMC	M	55
GSE158055	GSM4787437	S-S014	unknown	46	severe/critical	frozen PBMC	M	60
GSE158055	GSM4787438	S-S015	unknown	45	severe/critical	frozen PBMC	M	59
GSE158055	GSM4787439	S-S016	unknown	47	severe/critical	frozen PBMC	F	61
GSE158055	GSM4787440	S-S017	unknown	56	severe/critical	frozen PBMC	M	32
GSE158055	GSM4787441	S-S018	unknown	45	severe/critical	frozen PBMC	M	60
GSE158055	GSM4787442	S-S019	unknown	55	severe/critical	frozen PBMC	M	56
GSE158055	GSM4787443	S-S020	unknown	44	severe/critical	frozen PBMC	M	42
GSE158055	GSM4787306	S-M007-1	unknown	4	mild/moderate	B cells sorted from frozen PBMC (MACS, STEMCELL 19054)	M	15
GSE158055	GSM4787307	S-M007-2	unknown	4	mild/moderate	B cells sorted from frozen PBMC (MACS, STEMCELL 19054)	M	15
GSE158055	GSM4787308	S-M007-3	unknown	4	mild/moderate	B cells sorted from frozen PBMC (MACS, STEMCELL 19054)	M	15
GSE158055	GSM4787309	S-M007-4	unknown	22	mild/moderate	B cells sorted from frozen PBMC (MACS, STEMCELL 19054)	M	15
GSE158055	GSM4787310	S-M007-5	unknown	22	mild/moderate	B cells sorted from frozen PBMC (MACS, STEMCELL 19054)	M	15
GSE158055	GSM4787311	S-M007-6	unknown	22	mild/moderate	B cells sorted from frozen PBMC (MACS, STEMCELL 19054)	M	15
GSE158055	GSM4787312	S-M008-1	unknown	29	mild/moderate	B cells sorted from frozen PBMC (MACS, STEMCELL 19054)	M	48
GSE158055	GSM4787313	S-M008-2	unknown	29	mild/moderate	B cells sorted from frozen PBMC (MACS, STEMCELL 19054)	M	48
GSE158055	GSM4787316	S-M009-3	unknown	36	mild/moderate	B cells sorted from frozen PBMC (MACS, STEMCELL 19054)	F	58
GSE158055	GSM4787317	S-M009-4	unknown	42	mild/moderate	B cells sorted from frozen PBMC (MACS, STEMCELL 19054)	F	58
GSE158055	GSM4787318	S-M009-5	unknown	42	mild/moderate	B cells sorted from frozen PBMC (MACS, STEMCELL 19054)	F	58
GSE158055	GSM4787319	S-M009-6	unknown	42	mild/moderate	B cells sorted from frozen PBMC (MACS, STEMCELL 19054)	F	58
GSE158055	GSM4787444	S-S021-1	unknown	29	severe/critical	B cells sorted from frozen PBMC (MACS, STEMCELL 19054)	M	55
GSE158055	GSM4787445	S-S021-2	unknown	29	severe/critical	B cells sorted from frozen PBMC (MACS, STEMCELL 19054)	M	55
GSE158055	GSM4787446	S-S021-3	unknown	29	severe/critical	B cells sorted from frozen PBMC (MACS, STEMCELL 19054)	M	55
GSE158055	GSM4787447	S-S021-4	unknown	42	severe/critical	B cells sorted from frozen PBMC (MACS, STEMCELL 19054)	M	55
GSE158055	GSM4787448	S-S021-5	unknown	42	severe/critical	B cells sorted from frozen PBMC (MACS, STEMCELL 19054)	M	55
GSE158055	GSM4787333	S-M018	unknown	15	mild/moderate	fresh PBMC	F	54
GSE158055	GSM4787460	S-S029	unknown	34	severe/critical	fresh PBMC	F	62
GSE158055	GSM4787461	S-S030	unknown	32	severe/critical	fresh PBMC	M	60
GSE158055	GSM4787338	S-M023	unknown	17	mild/moderate	fresh PBMC	F	32
GSE158055	GSM4787462	S-S031	unknown	35	severe/critical	fresh PBMC	F	59
GSE158055	GSM4787339	S-M024	unknown	20	mild/moderate	fresh PBMC	F	79
GSE158055	GSM4787332	S-M017	unknown	19	mild/moderate	fresh PBMC	M	47
GSE158055	GSM4787334	S-M019	unknown	14	mild/moderate	fresh PBMC	M	53
GSE158055	GSM4787335	S-M020	unknown	25	mild/moderate	fresh PBMC	F	59
GSE158055	GSM4787336	S-M021	unknown	30	mild/moderate	fresh PBMC	F	47
GSE158055	GSM4787459	S-S028	unknown	35	severe/critical	fresh PBMC	M	70
GSE158055	GSM4787337	S-M022	unknown	31	mild/moderate	fresh PBMC	F	76
GSE158055	GSM4787292	S-M001	unknown	29	mild/moderate	frozen PBMC	M	33
GSE158055	GSM4787347	S-M030	unknown	15	mild/moderate	frozen PBMC	F	8
GSE158055	GSM4787348	S-M031-1	unknown	34	mild/moderate	fresh PBMC	F	29
GSE158055	GSM4787349	S-M031-2	unknown	34	mild/moderate	CD19+ B cell sorted from fresh PBMC (MACS)	F	29
GSE158055	GSM4787351	S-M032	unknown	unknown	mild/moderate	fresh PBMC	unknown	unknown
GSE158055	GSM4787352	S-M033	unknown	22	mild/moderate	CD19+ B cell sorted from fresh PBMC (MACS)	M	34
GSE158055	GSM4787353	S-M034	unknown	20	mild/moderate	fresh PBMC	M	35
GSE158055	GSM4787354	S-M035-1	unknown	15	mild/moderate	fresh PBMC	M	32
GSE158055	GSM4787355	S-M035-2	unknown	15	mild/moderate	CD19+ B cell sorted from fresh PBMC (MACS)	M	32
GSE158055	GSM4787356	S-M036-1	unknown	23	mild/moderate	fresh PBMC	M	51
GSE158055	GSM4787357	S-M036-2	unknown	23	mild/moderate	CD19+ B cell sorted from fresh PBMC (MACS)	M	51
GSE158055	GSM4787358	S-M037	unknown	33	mild/moderate	frozen PBMC	F	15
GSE158055	GSM4787359	S-M038	unknown	18	mild/moderate	frozen PBMC	M	15
GSE158055	GSM4787360	S-M039-1	unknown	22	mild/moderate	fresh PBMC	F	44
GSE158055	GSM4787361	S-M039-2	unknown	22	mild/moderate	CD19+ B cell sorted from fresh PBMC (MACS)	F	44
GSE158055	GSM4787362	S-M040-1	unknown	26	mild/moderate	fresh PBMC	M	46
GSE158055	GSM4787363	S-M040-2	unknown	26	mild/moderate	CD19+ B cell sorted from fresh PBMC (MACS)	M	46
GSE158055	GSM4787552	S-HC005	unknown	control	control	fresh PBMC	F	37
GSE158055	GSM4787553	S-HC006	unknown	control	control	fresh PBMC	M	27
GSE158055	GSM4787554	S-HC007	unknown	control	control	fresh PBMC	M	27
GSE158055	GSM4787433	S-S010-1	unknown	20	severe/critical	fresh Sputum	M	49
GSE158055	GSM4787434	S-S011-1	unknown	22	severe/critical	fresh Sputum	M	53
GSE158055	GSM4787435	S-S012-1	unknown	28	severe/critical	fresh Sputum	M	58
GSE158055	GSM4787296	S-M002-1	unknown	12	mild/moderate	fresh Sputum	F	25
GSE158055	GSM4787297	S-M003-1	unknown	13	mild/moderate	fresh Sputum	M	50
GSE158055	GSM4787416	S-S010-2	unknown	32	severe/critical	fresh Sputum	M	49
GSE158055	GSM4787424	S-S005-1	unknown	34	severe/critical	fresh Sputum	M	61
GSE158055	GSM4787425	S-S001-1	unknown	29	severe/critical	fresh Sputum	M	72
GSE158055	GSM4787427	S-S007-1	unknown	33	severe/critical	fresh Sputum	M	26
GSE158055	GSM4787428	S-S007-2	unknown	33	severe/critical	fresh Sputum	M	26
GSE158055	GSM4787293	S-M003-2	unknown	25	mild/moderate	fresh Sputum	M	50
GSE158055	GSM4787294	S-M003-3	unknown	25	mild/moderate	fresh Sputum	M	50
GSE158055	GSM4787429	S-S005-2	unknown	40	severe/critical	fresh Sputum	M	61
GSE158055	GSM4787430	S-S011-2	unknown	36	severe/critical	fresh Sputum	M	53
GSE158055	GSM4787295	S-M002-2	unknown	23	mild/moderate	fresh Sputum	F	25
GSE158055	GSM4787417	S-S012-2	unknown	37	severe/critical	fresh Sputum	M	58
GSE158055	GSM4787418	S-S002	unknown	30	severe/critical	fresh Sputum	F	72
GSE158055	GSM4787419	S-S003	unknown	29	severe/critical	fresh Sputum	M	66
GSE158055	GSM4787420	S-S012-3	unknown	37	severe/critical	fresh Sputum	M	58
GSE158055	GSM4787421	S-S004-1	unknown	12	severe/critical	fresh Sputum	F	65
GSE158055	GSM4787422	S-S004-2	unknown	12	severe/critical	fresh Sputum	F	65
GSE158055	GSM4787423	S-S004-3	unknown	12	severe/critical	fresh Sputum	F	65
GSE158055	GSM4787426	S-S006	unknown	14	severe/critical	fresh BALF	M	41
GSE158055	GSM4787431	S-S008	unknown	17	severe/critical	fresh BALF	F	55
GSE158055	GSM4787432	S-S009	unknown	16	severe/critical	fresh BALF	M	66
GSE158055	GSM4787414	S-S001-2	unknown	20	severe/critical	fresh PBMC	M	72
GSE158055	GSM4787415	S-S001-3	unknown	20	severe/critical	fresh PFMC	M	72
GSE158055	GSM4787571	S-HC021	unknown	control	control	fresh PBMC	M	28
GSE158055	GSM4787572	S-HC022	unknown	control	control	fresh PBMC	M	30
GSE158055	GSM4787573	S-HC023	unknown	control	control	fresh PBMC	M	30
GSE158055	GSM4787574	S-HC024	unknown	control	control	fresh PBMC	M	27
GSE158055	GSM4787575	S-HC025	unknown	control	control	fresh PBMC	M	29
GSE158055	GSM4787396	S-M069	unknown	126	mild/moderate	fresh PBMC	M	27
GSE158055	GSM4787397	S-M070	unknown	116	mild/moderate	fresh PBMC	F	33
GSE158055	GSM4787398	S-M071	unknown	117	mild/moderate	fresh PBMC	M	37
GSE158055	GSM4787399	S-M072	unknown	119	mild/moderate	fresh PBMC	M	38
GSE158055	GSM4787400	S-M073	unknown	113	mild/moderate	fresh PBMC	M	37
GSE158055	GSM4787528	S-S077	unknown	123	severe/critical	fresh PBMC	M	28
GSE158055	GSM4787529	S-S078	unknown	112	severe/critical	fresh PBMC	M	35
GSE158055	GSM4787530	S-S079	unknown	123	severe/critical	fresh PBMC	M	27
GSE158055	GSM4787531	S-S080	unknown	118	severe/critical	fresh PBMC	M	40
GSE158055	GSM4787532	S-S081	unknown	110	severe/critical	fresh PBMC	M	35
GSE158055	GSM4787533	S-S082	unknown	122	severe/critical	fresh PBMC	M	52
GSE158055	GSM4787534	S-S083	unknown	120	severe/critical	fresh PBMC	F	35
GSE158055	GSM4787535	S-S084	unknown	120	severe/critical	fresh PBMC	F	52
GSE158055	GSM4787475	S-S037	unknown	14	severe/critical	frozen PBMC	M	45
GSE158055	GSM4787476	S-S038	unknown	3	severe/critical	frozen PBMC	M	51
GSE158055	GSM4787477	S-S039	unknown	14	severe/critical	frozen PBMC	F	66
GSE158055	GSM4787478	S-S040	unknown	22	severe/critical	frozen PBMC	M	77
GSE158055	GSM4787479	S-S041	unknown	25	severe/critical	frozen PBMC	M	39
GSE158055	GSM4787480	S-S042	unknown	2	severe/critical	frozen PBMC	F	70
GSE158055	GSM4787481	S-S043	unknown	18	severe/critical	frozen PBMC	F	61
GSE158055	GSM4787482	S-S044	unknown	36	severe/critical	frozen PBMC	M	70
GSE158055	GSM4787483	S-S045	unknown	22	severe/critical	frozen PBMC	F	83
GSE158055	GSM4787484	S-S046	unknown	1	severe/critical	frozen PBMC	M	92
GSE158055	GSM4787485	S-S047	unknown	1	severe/critical	frozen PBMC	M	60
GSE158055	GSM4787486	S-S048	unknown	16	severe/critical	frozen PBMC	M	67
GSE158055	GSM4787487	S-S049	unknown	16	severe/critical	frozen PBMC	M	79
GSE158055	GSM4787488	S-S050	unknown	10	severe/critical	frozen PBMC	M	69
GSE158055	GSM4787489	S-S051	unknown	25	severe/critical	frozen PBMC	M	80
GSE158055	GSM4787490	S-S052	unknown	17	severe/critical	frozen PBMC	F	87
GSE158055	GSM4787491	S-S053	unknown	9	severe/critical	frozen PBMC	F	46
GSE149689	GSM4509011	nCoV 1	16	unknown	severe/critical	PBMC	M	63
GSE149689	GSM4509012	nCoV 2	10	unknown	mild/moderate	PBMC	F	82
GSE149689	GSM4509015	Normal 1	control	unknown	control	PBMC	F	63
GSE149689	GSM4509019	nCoV 3	3	unknown	severe/critical	PBMC	F	67
GSE149689	GSM4509020	nCoV 4	7	unknown	severe/critical	PBMC	F	67
GSE149689	GSM4509021	nCoV 5	13	unknown	mild/moderate	PBMC	M	46
GSE149689	GSM4509022	nCoV 6	3	unknown	mild/moderate	PBMC	F	38
GSE149689	GSM4509023	Normal 2	control	unknown	control	PBMC	F	54
GSE149689	GSM4509024	Normal 3	control	unknown	control	PBMC	F	67
GSE149689	GSM4509025	nCoV 7	5	unknown	severe/critical	PBMC	F	73
GSE149689	GSM4509026	nCoV 8	9	unknown	severe/critical	PBMC	F	73
GSE149689	GSM4509027	nCoV 9	3	unknown	severe/critical	PBMC	M	61
GSE149689	GSM4509028	nCoV 10	10	unknown	mild/moderate	PBMC	M	61
GSE149689	GSM4509029	Normal 4	control	unknown	control	PBMC	M	63
GSE149689	GSM4509030	nCoV 11	5	unknown	mild/asymptomatic	PBMC	F	62
GSE145926	GSM4339769	C141	11	11	mild/moderate	BALF	M	36
GSE145926	GSM4339770	C142	7	9	mild/moderate	BALF	F	37
GSE145926	GSM4339771	C143	9	11	severe/critical	BALF	M	62
GSE145926	GSM4339772	C144	19	13	mild/moderate	BALF	M	35
GSE145926	GSM4339773	C145	29	18	severe/critical	BALF	M	66
GSE145926	GSM4339774	C146	32	14	severe/critical	BALF	M	63
GSE145926	GSM4475048	C51	control	control	control	BALF	unknown	unknown
GSE145926	GSM4475049	C52	control	control	control	BALF	unknown	unknown
GSE145926	GSM4475050	C100	control	control	control	BALF	unknown	unknown
GSE145926	GSM4475051	C148	50	25	severe/critical	BALF	F	65
GSE145926	GSM4475052	C149	45	8	severe/critical	BALF	F	57
GSE145926	GSM4475053	C152	47	12	severe/critical	BALF	M	46
